# Supplementary material for: Probiotics in 14-day triple therapy for Asian pediatric patients with Helicobacter pylori infection: a network meta-analysis
Source: PubMed Central journal article supplement (PMC5707110; doi:10.18632/oncotarget.21633), 2017-10-07
Supplement: oncotarget-08-96409-s001.pdf [file oncotarget-08-96409-s001.pdf]

# Probiotics in 14-day triple therapy for Asian pediatric patients with *Helicobacter pylori* infection: a network meta-analysis

## SUPPLEMENTARY MATERIALS

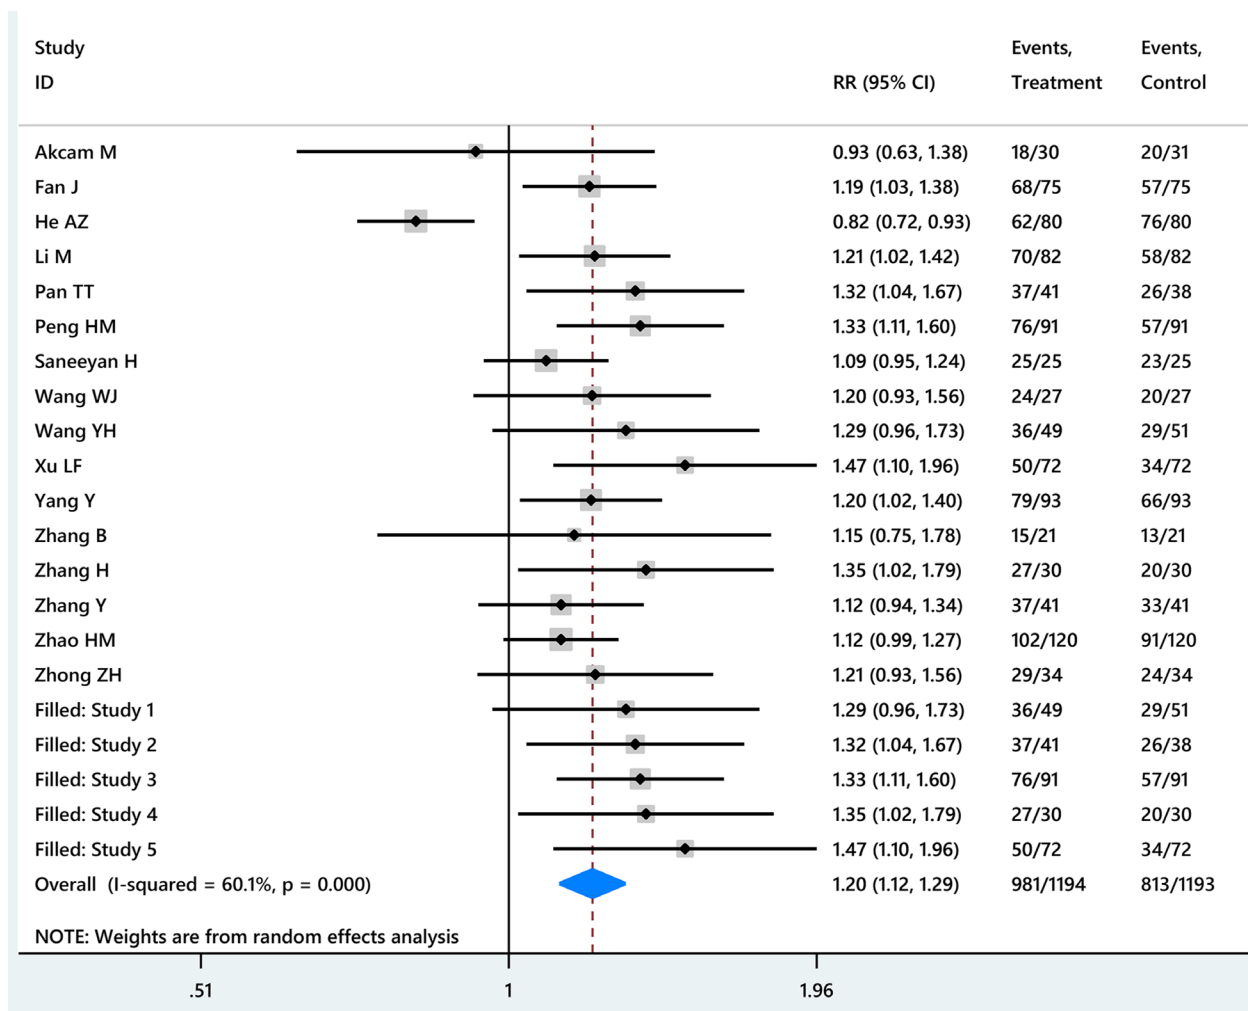

**Supplementary Figure 1: Forest plot for the outcome of *Helicobacter pylori* eradication after trimming and inputting 5 studies using the trim and fill method.** Multi-strain probiotics 1: *Bifidobacterium animalis*+ *Lactobacillus acidophilus*+*Lactobacillus casei*; Multi-strain probiotics 2: *Bacillus mesentericus*+*Clostridium butyricum*+*Streptococcus faecalis*; Multi-strain probiotics 3: *Bifidobacterium bifidum*+*Bifidobacterium infantis*+*Lactobacillus acidophilus*+*Lactobasillus bulgaricus*+*Lactobasillus casei*, *Lactobasillus reuteri*+*Streptococcus*; Multi-strain probiotics 4: *Bifidobacterium infantis*+*Clostridium butyricum*; Multi-strain probiotics 5: *Bifidobacterium longum*+*Enterococcus faecalis*+*Lactobacillus acidophilus*; Multi-strain probiotics 6: *Bifidobacterium longum*+*Lactobacillus bulgaricus*+*Streptococcus thermophilus*; Multi-strain probiotics 7: *Lactobacillus acidophilus*+*Bifidobacterium bifidum*; Multi-strain probiotics 8: *Lactobacillus delbrueckii*+*Lactobacillus acidophilus*+*Lactococcus lactis*).

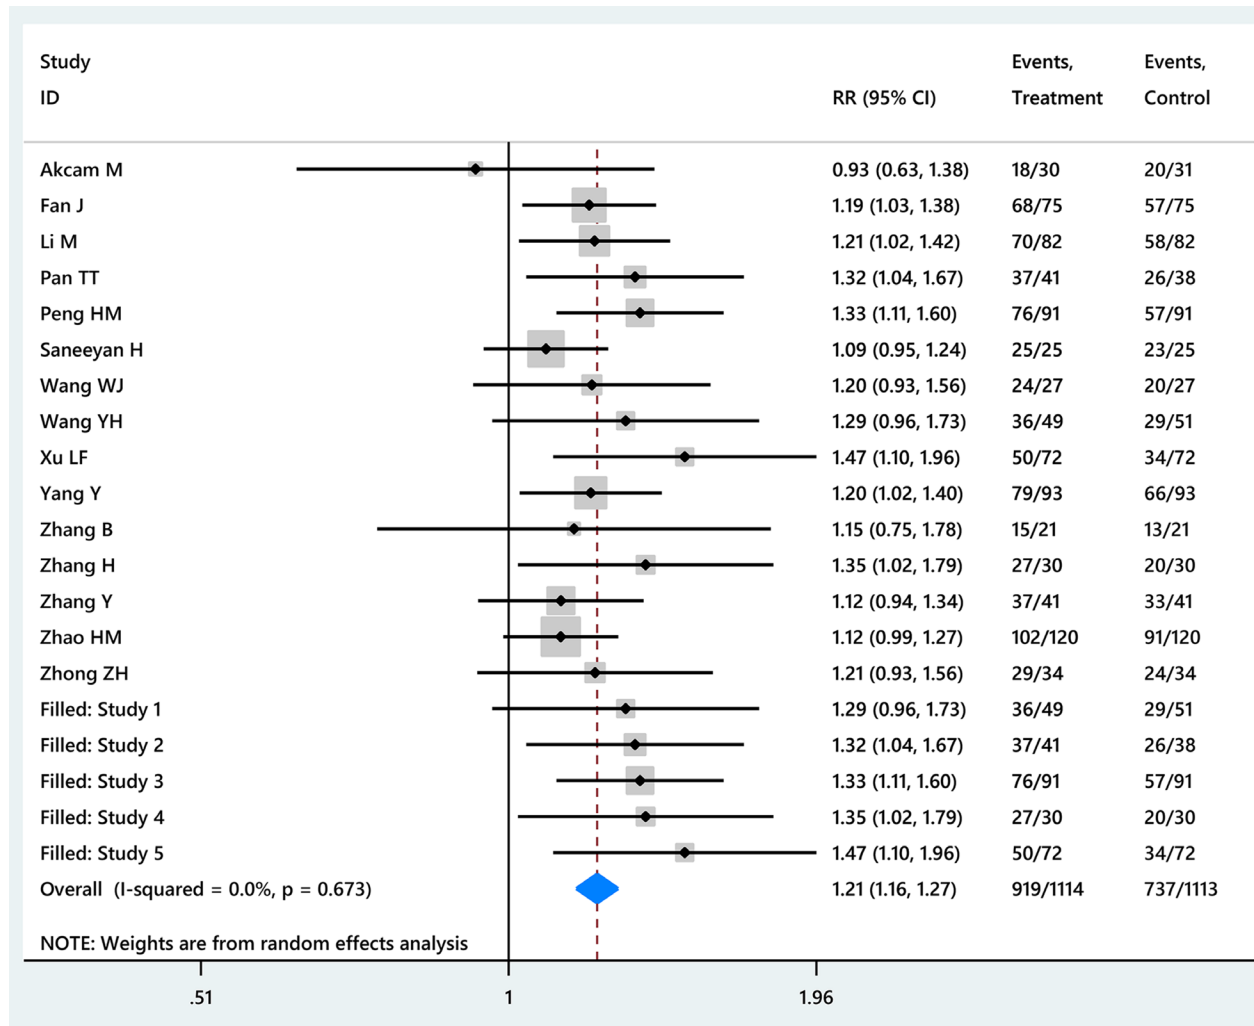

Supplementary Figure 2: Pooled estimate of *Helicobacter pylori* eradication when omitting He AZ et al study on basis of Supplementary Figure 1.

**Supplementary Table 1: Conventional meta-analysis based on random effects model for *Helicobacter pylori* eradication of probiotic regimens supplemented 14-day triple therapy compared with placebo**

| Probiotics VS. Placebo                                                                                                                                                                                                     | Number of Studies     | Number of Patients | RR<br>(95% CI)          | Heterogeneity |                    |
|----------------------------------------------------------------------------------------------------------------------------------------------------------------------------------------------------------------------------|-----------------------|--------------------|-------------------------|---------------|--------------------|
|                                                                                                                                                                                                                            |                       |                    |                         | P Value       | I <sup>2</sup> (%) |
| <b>Total</b>                                                                                                                                                                                                               | <b>16</b>             | <b>1822</b>        | <b>1.16 (1.07–1.26)</b> | <b>0.00</b>   | <b>62.7</b>        |
|                                                                                                                                                                                                                            | <b>15<sup>#</sup></b> | <b>1662</b>        | <b>1.19 (1.13–1.25)</b> | <b>0.71</b>   | <b>0</b>           |
| <i>Bifidobacterium animalis</i> , <i>Lactobacillus acidophilus</i> and <i>Lactobacillus casei</i>                                                                                                                          | 1                     | 61                 | 0.93 (0.63–1.38)        | -             | -                  |
| <i>Bacillus mesentericus</i> , <i>Clostridium butyricum</i> and <i>Streptococcus faecalis</i>                                                                                                                              | 1                     | 182                | 1.33 (1.11–1.60)        | -             | -                  |
| <i>Bifidobacterium bifidum</i> , <i>Bifidobacterium infantis</i> , <i>Lactobacillus acidophilus</i> , <i>Lactobacillus bulgaricus</i> , <i>Lactobacillus casei</i> , <i>Lactobacillus reuteri</i> and <i>Streptococcus</i> | 1                     | 50                 | 1.09 (0.95–1.24)        | -             | -                  |
| <i>Bifidobacterium infantis</i> and <i>Clostridium butyricum</i>                                                                                                                                                           | 1                     | 144                | 1.47 (1.10–1.96)        | -             | -                  |
| <i>Bifidobacterium longum</i> , <i>Enterococcus faecalis</i> and <i>Lactobacillus acidophilus</i>                                                                                                                          | 1                     | 186                | 1.20 (1.02–1.40)        | -             | -                  |
| <i>Bifidobacterium longum</i> , <i>Lactobacillus bulgaricus</i> and <i>Streptococcus thermophilus</i>                                                                                                                      | 4                     | 432                | 1.08 (0.85–1.36)        | 0.00          | 84.6               |
|                                                                                                                                                                                                                            | 3 <sup>#</sup>        | 272                | 1.20 (1.07–1.34)        | 1.00          | 0                  |
| <i>Lactobacillus acidophilus</i>                                                                                                                                                                                           | 2                     | 243                | 1.24 (1.08–1.42)        | 0.55          | 0                  |
| <i>Lactobacillus acidophilus</i> and <i>Bifidobacterium bifidum</i>                                                                                                                                                        | 1                     | 100                | 1.29 (0.96–1.73)        | -             | -                  |
| <i>Saccharomyces boulardii</i>                                                                                                                                                                                             | 4                     | 424                | 1.15 (1.04–1.26)        | 0.68          | 0                  |

CI: confidence interval; RR: relative ratio; # indicated that meta-analysis and sensitivity analysis was performed by omitting He AZ (2014).

**Supplementary Table 2: Conventional meta-analysis based on random effects model for the safety of probiotic regimens supplemented 14-day triple therapy compared with placebo**

| Probiotics VS. Placebo                                                                 | Number of Studies | Number of Patients | RR (95% CI)             | Heterogeneity  |                    |
|----------------------------------------------------------------------------------------|-------------------|--------------------|-------------------------|----------------|--------------------|
|                                                                                        |                   |                    |                         | <i>P</i> Value | I <sup>2</sup> (%) |
| <b>Total side effects</b>                                                              | <b>12</b>         | <b>1619</b>        | <b>0.40 (0.34–0.48)</b> | <b>0.87</b>    | <b>0</b>           |
| <i>Bacillus mesentericus, Clostridium butyricum and Streptococcus faecalis</i>         | 1                 | 182                | 0.31 (0.22–0.45)        | -              | -                  |
| <i>Bifidobacterium infantis and Clostridium butyricum</i>                              | 1                 | 144                | 0.67 (0.32–1.38)        | -              | -                  |
| <i>Bifidobacterium longum, Enterococcus faecalis and Lactobacillus acidophilus</i>     | 1                 | 286                | 0.38 (0.18–0.76)        | -              | -                  |
| <i>Bifidobacterium longum, Lactobacillus bulgaricus and Streptococcus thermophilus</i> | 3                 | 278                | 0.46 (0.35–0.59)        | 0.93           | 0                  |
| <i>Lactobacillus acidophilus</i>                                                       | 2                 | 243                | 0.33 (0.33–0.62)        | 0.49           | 0                  |
| <i>Lactobacillus acidophilus and Bifidobacterium bifidum</i>                           | 1                 | 100                | 0.47 (0.18–1.26)        | -              | -                  |
| <i>Lactobacillus delbrueckii, Lactobacillus acidophilus and Lactococcus lactis</i>     | 1                 | 110                | 0.28 (0.06–1.32)        | -              | -                  |
| <i>Saccharomyces boulardii</i>                                                         | 2                 | 276                | 0.41 (0.24–0.68)        | 0.89           | 0                  |

CI: confidence interval; RR: relative ratio.

**Supplementary Table 3: League table representing summary estimates on eradication rates of *H. pylori* in network meta-analysis**

|                           | Lactobacillus acidophilus | Multi-strain probiotics 2 | Multi-strain probiotics 4 | Multi-strain probiotics 5 | Multi-strain probiotics 6 | Multi-strain probiotics 7 | Multi-strain probiotics 8 | Placebo             | Saccharomyces boulardii |
|---------------------------|---------------------------|---------------------------|---------------------------|---------------------------|---------------------------|---------------------------|---------------------------|---------------------|-------------------------|
| Lactobacillus acidophilus |                           | 1.06<br>(0.51–2.21)       | 0.50<br>(0.19–1.30)       | 0.88<br>(0.34–2.28)       | 0.73<br>(0.36–1.45)       | 0.70<br>(0.22–2.25)       | 1.19<br>(0.22–6.38)       | 0.33<br>(0.17–0.62) | 0.81<br>(0.36–1.85)     |
| Multi-strain probiotics 2 | 0.94(0.45–1.96)           |                           | 0.47<br>(0.21–1.06)       | 0.83<br>(0.37–1.84)       | 0.68<br>(0.43–1.07)       | 0.66<br>(0.23–1.87)       | 1.12<br>(0.23–5.53)       | 0.31<br>(0.22–0.45) | 0.76<br>(0.41–1.44)     |
| Multi-strain probiotics 4 | 2.02<br>(0.77–5.32)       | 2.14<br>(0.95–4.86)       |                           | 1.78<br>(0.64–4.92)       | 1.47<br>(0.67–3.19)       | 1.41<br>(0.41–4.79)       | 2.40<br>(0.43–13.38)      | 0.67<br>(0.32–1.38) | 1.64<br>(0.67–4.02)     |
| Multi-strain probiotics 5 | 1.14<br>(0.44–2.95)       | 1.21<br>(0.54–2.68)       | 0.56<br>(0.20–1.56)       |                           | 0.82<br>(0.39–1.76)       | 0.79<br>(0.24–2.66)       | 1.35<br>(0.24–7.46)       | 0.37<br>(0.18–0.76) | 0.92<br>(0.38–2.22)     |
| Multi-strain probiotics 6 | 1.38<br>(0.69–2.75)       | 1.46<br>(0.93–2.30)       | 0.68<br>(0.31–1.48)       | 1.21<br>(0.57–2.59)       |                           | 0.96<br>(0.35–2.66)       | 1.64<br>(0.34–7.94)       | 0.46<br>(0.35–0.59) | 1.12<br>(0.63–2.00)     |
| Multi-strain probiotics 7 | 1.43<br>(0.44–4.62)       | 1.52<br>(0.53–4.34)       | 0.71<br>(0.21–2.41)       | 1.26<br>(0.38–4.24)       | 1.04<br>(0.38–2.87)       |                           | 1.70<br>(0.27–10.72)      | 0.47<br>(0.18–1.26) | 1.16<br>(0.38–3.53)     |
| Multi-strain probiotics 8 | 0.84<br>(0.16–4.52)       | 0.89<br>(0.18–4.42)       | 0.42<br>(0.07–2.32)       | 0.74<br>(0.13–4.10)       | 0.61<br>(0.13–2.96)       | 0.59<br>(0.09–3.70)       |                           | 0.28<br>(0.06–1.32) | 0.68<br>(0.13–3.52)     |
| Placebo                   | 3.03<br>(1.60–5.73)       | 3.22<br>(2.23–4.64)       | 1.50<br>(0.72–3.11)       | 2.67<br>(1.31–5.42)       | 2.20<br>(1.69–2.86)       | 2.11<br>(0.79–5.64)       | 3.60<br>(0.76–17.06)      |                     | 2.46<br>(1.47–4.13)     |
| Saccharomyces boulardii   | 1.23<br>(0.54–2.80)       | 1.31<br>(0.69–2.47)       | 0.61<br>(0.25–1.49)       | 1.08<br>(0.45–2.61)       | 0.89<br>(0.50–1.60)       | 0.86<br>(0.28–2.61)       | 1.46<br>(0.28–7.54)       | 0.41<br>(0.24–0.68) |                         |

Multi-strain probiotics 1: *Bifidobacterium animalis*+ *Lactobacillus acidophilus*+*Lactobacillus casei*; Multi-strain probiotics 2: *Bacillus mesentericus*+*Clostridium butyricum*+*Streptococcus faecalis*; Multi-strain probiotics 3: *Bifidobacterium bifidum*+*Bifidobacterium infantis*+*Lactobacillus acidophilus*+*Lactobasillus bulgaricus*+*Lactobasillus casei*, *Lactobasillus reuteri*+*Streptococcus*; Multi-strain probiotics 4: *Bifidobacterium infantis*+*Clostridium butyricum*; Multi-strain probiotics 5: *Bifidobacterium longum*+*Enterococcus faecalis*+*Lactobacillus acidophilus*; Multi-strain probiotics 6: *Bifidobacterium longum*+*Lactobacillus bulgaricus*+*Streptococcus thermophilus*; Multi-strain probiotics 7: *Lactobacillus acidophilus*+*Bifidobacterium bifidum*; Multi-strain probiotics 8: *Lactobacillus delbrueckii*+*Lactobacillus acidophilus*+*Lactococcus lactis*).

**Supplementary Table 4: League table representing summary estimates on total side effects in network meta-analysis**

|                           | Lactobacillus acidophilus | Multi-strain probiotics 1 | Multi-strain probiotics 2 | Multi-strain probiotics 3 | Multi-strain probiotics 4 | Multi-strain probiotics 5 | Multi-strain probiotics 6 | Multi-strain probiotics 7 | Placebo             | Saccharomyces boulardii |
|---------------------------|---------------------------|---------------------------|---------------------------|---------------------------|---------------------------|---------------------------|---------------------------|---------------------------|---------------------|-------------------------|
| Lactobacillus acidophilus |                           | 1.35<br>(0.79–2.31)       | 0.94<br>(0.62–1.42)       | 1.16<br>(0.79–1.70)       | 0.85<br>(0.53–1.36)       | 1.05<br>(0.70–1.56)       | 1.18<br>(0.88–1.58)       | 0.97<br>(0.61–1.56)       | 1.25<br>(0.98–1.60) | 1.07<br>(0.79–1.45)     |
| Multi-strain probiotics 1 | 0.74<br>(0.43–1.27)       |                           | 0.70<br>(0.39–1.25)       | 0.86<br>(0.49–1.51)       | 0.63<br>(0.34–1.18)       | 0.78<br>(0.44–1.38)       | 0.87<br>(0.52–1.45)       | 0.72<br>(0.38–1.35)       | 0.93<br>(0.58–1.50) | 0.79<br>(0.48–1.33)     |
| Multi-strain probiotics 2 | 1.06<br>(0.70–1.60)       | 1.43<br>(0.80–2.57)       |                           | 1.23<br>(0.78–1.92)       | 0.91<br>(0.54–1.53)       | 1.11<br>(0.70–1.77)       | 1.25<br>(0.86–1.82)       | 1.03<br>(0.61–1.74)       | 1.33<br>(0.96–1.86) | 1.14<br>(0.78–1.66)     |
| Multi-strain probiotics 3 | 0.86<br>(0.59–1.27)       | 1.17<br>(0.66–2.06)       | 0.81<br>(0.52–1.27)       |                           | 0.74<br>(0.45–1.22)       | 0.91<br>(0.59–1.40)       | 1.02<br>(0.72–1.44)       | 0.84<br>(0.51–1.39)       | 1.09<br>(0.8–1.47)  | 0.93<br>(0.65–1.32)     |
| Multi-strain probiotics 4 | 1.17<br>(0.73–1.87)       | 1.58<br>(0.85–2.96)       | 1.10<br>(0.66–1.86)       | 1.36<br>(0.82–2.24)       |                           | 1.23<br>(0.74–2.05)       | 1.38<br>(0.89–2.13)       | 1.14<br>(0.64–2.01)       | 1.47<br>(0.99–2.2)  | 1.26<br>(0.81–1.95)     |
| Multi-strain probiotics 5 | 0.95<br>(0.64–1.42)       | 1.29<br>(0.72–2.29)       | 0.90<br>(0.57–1.42)       | 1.10<br>(0.71–1.71)       | 0.81<br>(0.49–1.36)       |                           | 1.12<br>(0.78–1.61)       | 0.93<br>(0.55–1.55)       | 1.20<br>(0.87–1.65) | 1.02<br>(0.71–1.48)     |
| Multi-strain probiotics 6 | 0.85<br>(0.63–1.14)       | 1.15<br>(0.69–1.91)       | 0.80<br>(0.55–1.16)       | 0.98<br>(0.70–1.39)       | 0.72<br>(0.47–1.12)       | 0.89<br>(0.62–1.28)       |                           | 0.82<br>(0.53–1.28)       | 1.07<br>(0.90–1.26) | 0.91<br>(0.71–1.17)     |
| Multi-strain probiotics 7 | 1.03<br>(0.64–1.65)       | 1.39<br>(0.74–2.60)       | 0.97<br>(0.57–1.64)       | 1.19<br>(0.72–1.97)       | 0.88<br>(0.5–1.55)        | 1.08<br>(0.65–1.81)       | 1.21<br>(0.78–1.88)       |                           | 1.29<br>(0.86–1.93) | 1.10<br>(0.71–1.72)     |
| Placebo                   | 0.80<br>(0.63–1.02)       | 1.08<br>(0.67–1.74)       | 0.75<br>(0.54–1.05)       | 0.92<br>(0.68–1.24)       | 0.68<br>(0.46–1.02)       | 0.84<br>(0.61–1.15)       | 0.94<br>(0.79–1.11)       | 0.77<br>(0.52–1.16)       |                     | 0.85<br>(0.71–1.03)     |
| Saccharomyces boulardii   | 0.93<br>(0.69–1.26)       | 1.26<br>(0.75–2.10)       | 0.88<br>(0.60–1.28)       | 1.08<br>(0.76–1.53)       | 0.80<br>(0.51–1.24)       | 0.98<br>(0.68–1.41)       | 1.10<br>(0.86–1.41)       | 0.91<br>(0.58–1.41)       | 1.17<br>(0.98–1.41) |                         |

Multi-strain probiotics 1: *Bifidobacterium animalis*+ *Lactobacillus acidophilus*+*Lactobacillus casei*; Multi-strain probiotics 2: *Bacillus mesentericus*+*Clostridium butyricum*+*Streptococcus faecalis*; Multi-strain probiotics 3: *Bifidobacterium bifidum*+*Bifidobacterium infantis*+*Lactobacillus acidophilus*+*Lactobasillus bulgaricus*+*Lactobasillus casei*, *Lactobasillus reuteri*+*Streptococcus*; Multi-strain probiotics 4: *Bifidobacterium infantis*+ *Clostridium butyricum*; Multi-strain probiotics 5: *Bifidobacterium longum*+ *Enterococcus faecalis*+*Lactobacillus acidophilus*; Multi-strain probiotics 6: *Bifidobacterium longum*+*Lactobacillus bulgaricus*+*Streptococcus thermophilus*; Multi-strain probiotics 7: *Lactobacillus acidophilus*+*Bifidobacterium bifidum*; Multi-strain probiotics 8: *Lactobacillus delbrueckii*+*Lactobacillus acidophilus*+*Lactococcus lactis*.

**Supplementary Table 5: Characteristics of included studies in the meta-analysis. See Supplementary Table\_5**
